# Supplementary material
Source: Springer Nature journal article supplement (https://www.springermedizin.de/resource/supplementary/12885_2007_869_MOESM18_ESM.pdf/9470540)

OMRF 7T/30

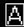

BRUKER spect

RS\_7

Date: 1 Aug 2005

RS\_7

Time: 22:46

\*

M 5.0 kg

W 2967  
L 1484

cm

1

0

Scan: 14  
Slice: 6/8  
Echo: 2/2  
MSME (pvm)  
TR: 1200.0 ms  
TE: 52.2 ms  
NEX 4

SI 1.00/1.15 mm  
FOV 3.2 cm  
MTX 256

Pos 6.12 mm H  
bladder MRI: 1  
OMRF\_double\_echo, 14: 1

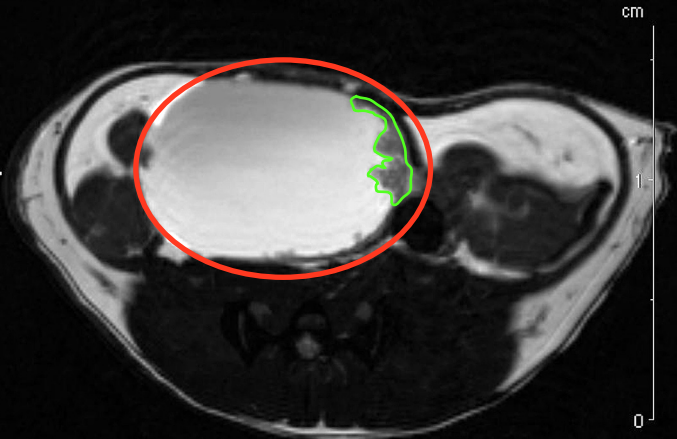

Supplement: MOESM18 [file 9470540]
